# Supplementary material for: Association between the Carbohydrate Quality Index (CQI) and Nutritional Adequacy in a Pediatric Cohort: The SENDO Project
Source: MDPI journal article supplement (doi:10.3390/children10101711), 2023-10-20
Supplement: s1 [file s1]

## **SUPPLEMENTARY MATERIAL**

**Table S1.** Criteria used to calculate the carbohydrate quality index (CQI).

| <b>Components of the carbohydrate quality index (CQI)</b>                                     | <b>Index range (points)</b> | <b>Criteria for minimum index</b>            | <b>Criteria for maximum index</b>             |
|-----------------------------------------------------------------------------------------------|-----------------------------|----------------------------------------------|-----------------------------------------------|
| <b>Dietary fiber intake (g/d)</b>                                                             | 1-5                         | Minimum dietary fiber (first quintile)       | Maximum dietary fiber intake (fifth quintile) |
| <b>Glycemic index</b>                                                                         | 1-5                         | Maximum glycemic index (first quintile)      | Minimum glycemic index (fifth quintile)       |
| <b>Ratio of whole grains: (whole grains + refined grains of their products)</b>               | 1-5                         | Minimum value of this ratio (first quintile) | Maximum value of this ratio (fifth quintile)  |
| <b>Ratio of solid carbohydrates (g): (solid carbohydrates (g) + liquid carbohydrates (g))</b> | 1-5                         | Minimum value of this ratio (first quintile) | Maximum value of this ratio (fifth quintile)  |
| <b>Total index (range)</b>                                                                    | <b>4-20</b>                 |                                              |                                               |

Table S2. Parameters of carbohydrate quality intake across quartiles of CQI. Mean (sd)

|                                                     | CQI           |               |               |               |
|-----------------------------------------------------|---------------|---------------|---------------|---------------|
|                                                     | Q1            | Q2            | Q3            | Q4            |
| Fibre intake (g/d)                                  | 15.91 (4.19)  | 20.21 (3.87)  | 22.51 (5.42)  | 27.17 (6.10)  |
| Glycemic index                                      | 50.5 (3.6)    | 49.4 (4.0)    | 48.8 (3.3)    | 47.6 (3.5)    |
| Carbohydrate intake<br>from whole grains<br>(g/d)   | 0.62 (2.52)   | 1.45 (3.29)   | 7.02 (10.18)  | 11.99 (10.30) |
| Carbohydrate intake<br>from refined grains<br>(g/d) | 74.56 (28.73) | 74.67 (31.37) | 67.61 (29.05) | 56.88 (23.88) |
| Solid carbohydrate in-<br>take (g/d)                | 171.7 (46.5)  | 194.6 (45.7)  | 198.5 (52.5)  | 206.6 (45.9)  |
| Liquid carbohydrate<br>intake (g/d)                 | 34.4 (17.2)   | 31.8 (17.7)   | 27.9 (17.0)   | 19.9 (13.3)   |

**Table S3.** Prevalence of inadequate micronutrient intake according to quartiles of CQI (percentages).

|                                  | CQI  |      |      |      |
|----------------------------------|------|------|------|------|
|                                  | Q1   | Q2   | Q3   | Q4   |
| n                                | 252  | 178  | 219  | 174  |
| <b>% Inadequate Intake</b>       |      |      |      |      |
| <b>Vitamin A (equiv Retinol)</b> | 2.4  | 0.0  | 0.0  | 0.0  |
| <b>Vitamin C</b>                 | 1.2  | 0.0  | 0.0  | 0.0  |
| <b>Vitamin D</b>                 | 100  | 100  | 100  | 100  |
| <b>Vitamin E</b>                 | 35.7 | 24.7 | 21.5 | 14.9 |
| <b>Vitamin B1</b>                | 0.0  | 0.0  | 0.0  | 0.0  |
| <b>Vitamin B2</b>                | 0.0  | 0.0  | 0.0  | 0.0  |
| <b>Vitamin B3</b>                | 0.0  | 0.0  | 0.0  | 0.0  |
| <b>Vitamin B6</b>                | 0.0  | 0.0  | 0.0  | 0.0  |
| <b>Folic Acid</b>                | 11.1 | 2.3  | 0.9  | 0.6  |
| <b>Vitamin B12</b>               | 0.0  | 0.0  | 0.0  | 0.6  |
| <b>Ca</b>                        | 17.9 | 11.8 | 11.9 | 13.8 |
| <b>I</b>                         | 9.1  | 3.9  | 3.2  | 5.7  |
| <b>Fe</b>                        | 0.0  | 0.0  | 0.0  | 0.0  |
| <b>P</b>                         | 0.0  | 0.0  | 0.0  | 0.0  |
| <b>Mg</b>                        | 0.0  | 0.0  | 0.0  | 0.0  |
| <b>Se</b>                        | 0.0  | 0.0  | 0.0  | 0.0  |
| <b>Zn</b>                        | 0.0  | 0.0  | 0.0  | 0.0  |
| <b>Cr</b>                        | 0.8  | 0.0  | 0.0  | 0.0  |
| <b>K</b>                         | 26.2 | 5.6  | 5.9  | 2.3  |
| <b>Na</b>                        | 0.4  | 0.0  | 1.37 | 0.6  |

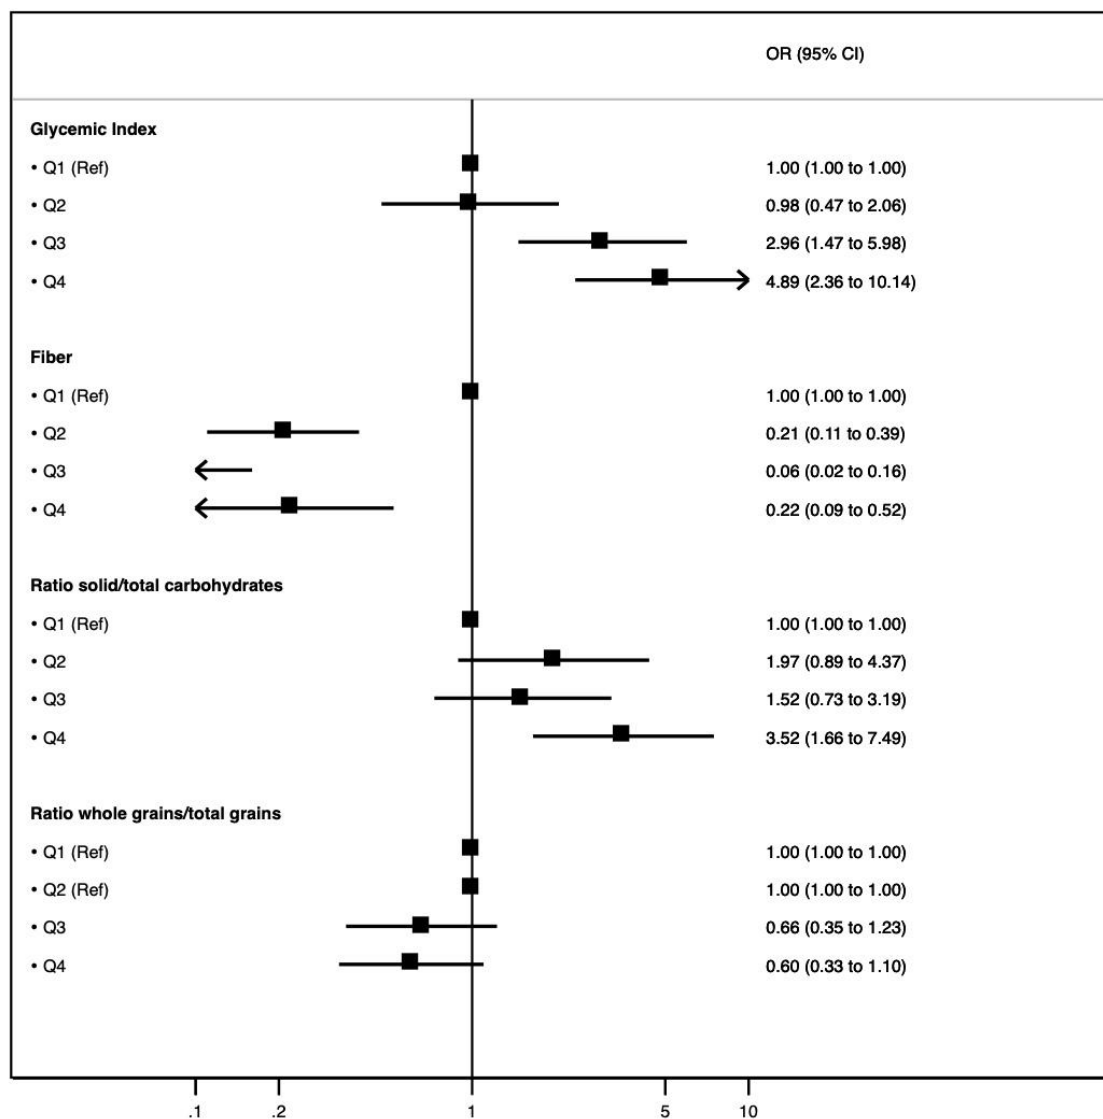

**Figure S1.** Odds Ratio and 95% CI of inadequate intake of  $\geq 3$  micronutrients associated with quartiles of each component of the CQI.
